# Supplementary material
Source: PubMed Central journal article supplement (PMC2639326)
Supplement: djn416_1.pdf [file djn416_1.pdf]

**Supplementary Table 1.** SWI/SNF-related gene probes on the Affymetrix U133 expression array and current assessment of gene expression in acute lymphoblastic leukemia ALL cells\*

| Gene symbol | Gene name                                               | Probe set ID | Public ID | Expression |
|-------------|---------------------------------------------------------|--------------|-----------|------------|
| ARID1A      | AT-rich interactive domain 1A (SWI-like), BAF250        | 210649_s_at  | AF231056  | Yes        |
| ARID1A      | AT-rich interactive domain 1A (SWI-like), BAF250        | 218917_s_at  | NM_018450 | Yes        |
| ARID1A      | AT-rich interactive domain 1A (SWI-like), BAF250        | 212152_x_at  | AI679080  | Yes        |
| SMARCA1     | SWI/SNF, subfamily a, member 1, SNF2L1                  | 215294_s_at  | AK026426  | No         |
| SMARCA1     | SWI/SNF, subfamily a, member 1, SNF2L1                  | 203875_at    | NM_003069 | No         |
| SMARCA1     | SWI/SNF, subfamily a, member 1, SNF2L1                  | 203873_at    | M88163    | No         |
| SMARCA1     | SWI/SNF, subfamily a, member 1, SNF2L1                  | 203874_s_at  | NM_003069 | No         |
| SMARCA2     | SWI/SNF, subfamily a, member 2, BRM, core               | 212258_s_at  | X72889    | No         |
| SMARCA2     | SWI/SNF, subfamily a, member 2, BRM, core               | 206543_at    | NM_003070 | No         |
| SMARCA2     | SWI/SNF, subfamily a, member 2, BRM, core               | 206544_x_at  | NM_003070 | No         |
| SMARCA2     | SWI/SNF, subfamily a, member 2, BRM, core               | 212257_s_at  | AW131754  | No         |
| SMARCA2     | SWI/SNF, subfamily a, member 2, BRM, core               | 206542_s_at  | AV725365  | No         |
| SMARCA2     | SWI/SNF, subfamily a, member 2, BRM, core               | 217707_x_at  | AI535683  | No         |
| HLTF        | helicase-like transcription factor, SMARCA3             | 202983_at    | AI760760  | Yes        |
| SMARCA4     | SWI/SNF, subfamily a, member 4, BRG1, ATPase, core      | 208793_x_at  | AI744900  | Yes        |
| SMARCA4     | SWI/SNF, subfamily a, member 4, BRG1, ATPase, core      | 212520_s_at  | AI684141  | Yes        |
| SMARCA4     | SWI/SNF, subfamily a, member 4, BRG1, ATPase, core      | 208794_s_at  | D26156    | Yes        |
| SMARCA4     | SWI/SNF, subfamily a, member 4, BRG1, ATPase, core      | 214728_x_at  | AK026573  | Yes        |
| SMARCA4     | SWI/SNF, subfamily a, member 4, BRG1, ATPase, core      | 215714_s_at  | AF254822  | No         |
| SMARCA4     | SWI/SNF, subfamily a, member 4, BRG1, ATPase, core      | 213720_s_at  | AI744900  | No         |
| SMARCA5     | SWI/SNF, subfamily a, member 5, SNF2F                   | 213251_at    | AV712064  | Yes        |
| SMARCA5     | SWI/SNF, subfamily a, member 5, SNF2F                   | 213859_x_at  | AI652586  | No         |
| SMARCA5     | SWI/SNF, subfamily a, member 5, SNF2F                   | 202303_x_at  | NM_003601 | No         |
| SMARCAL1    | SWI/SNF, subfamily a-like 1                             | 218452_at    | NM_014140 | No         |
| SMARCB1     | SWI/SNF, subfamily b, member 1, SNF5, INI1, BAF47, core | 212167_s_at  | AK021419  | Yes        |
| SMARCC1     | SWI/SNF, subfamily c, member 1, BAF155, core            | 201072_s_at  | AW152160  | Yes        |
| SMARCC1     | SWI/SNF, subfamily c, member 1, BAF155, core            | 201075_s_at  | NM_003074 | Yes        |
| SMARCC1     | SWI/SNF, subfamily c, member 1, BAF155, core            | 201073_s_at  | AL040633  | Yes        |
| SMARCC1     | SWI/SNF, subfamily c, member 1, BAF155, core            | 201074_at    | AA593983  | Yes        |
| SMARCC2     | SWI/SNF, subfamily c, member 2, BAF170, core            | 201320_at    | BF663402  | No         |
| SMARCC2     | SWI/SNF, subfamily c, member 2, BAF170, core            | 201321_s_at  | NM_003075 | Yes        |
| SMARCD1     | SWI/SNF, subfamily d, member 1, BAF60a                  | 203183_s_at  | NM_003076 | Yes        |
| SMARCD1     | SWI/SNF, subfamily d, member 1, BAF60a                  | 209518_at    | AI869240  | Yes        |
| SMARCD2     | SWI/SNF, subfamily d, member 2, BAF60b                  | 201827_at    | AF113019  | Yes        |
| SMARCD3     | SWI/SNF, subfamily d, member 3, BAF60c                  | 204099_at    | NM_003078 | No         |
| SMARCE1     | SWI/SNF, subfamily e, member 1, BAF57                   | 211989_at    | NM_003079 | Yes        |
| SMARCE1     | SWI/SNF, subfamily e, member 1, BAF57                   | 211988_at    | BG289800  | Yes        |
| ACTL6A      | actin-like 6A, BAF53a                                   | 202666_s_at  | NM_004301 | No         |
| ACTL6B      | actin-like 6B, BAF53b                                   | 206013_s_at  | NM_016188 | No         |
| ACTL6B      | actin-like 6B, BAF53b                                   | 206014_at    | NM_016188 | No         |
| PB1         | polybromo 1, BAF180                                     | 220355_s_at  | NM_018165 | Yes        |

\* ALL = acute lymphoblastic leukemia; ID = identifier

**Supplementary Table 2.** Gene probes associated with prednisolone sensitivity in primary acute lymphoblastic leukemia cells: the German Cooperative Study Group for Childhood Acute Lymphoblastic Leukemia COALL-92/97 and the ALL-IX Dutch Childhood Oncology Group discovery cohort\*

| Gene symbol | Probe set ID | <i>P</i> † | Rho†  | R/S ratio‡   |
|-------------|--------------|------------|-------|--------------|
| ARID1A      | 212152_x_at  | .022       | -0.17 | 0.77 (.002)  |
| ARID1A      | 218917_s_at  | .007       | -0.20 | 0.85 (.007)  |
| ARID1A      | 210649_s_at  | .005       | -0.21 | 0.64 (.002)  |
| ARID1A§     |              | .002       | -0.23 | 0.34 (.0007) |
| SMARCA4     | 208793_x_at  | <.001      | -0.26 | 0.65 (.001)  |
| SMARCA4     | 208794_s_at  | <.001      | -0.27 | 0.58 (.0003) |
| SMARCA4     | 214728_x_at  | .002       | -0.24 | 0.64 (.001)  |
| SMARCA4     | 212520_s_at  | .001       | -0.24 | 0.74 (.003)  |
| SMARCA4§    |              | <.001      | -0.28 | 0.25 (.0004) |
| SMARCC2     | 201321_s_at  | .002       | -0.18 | 0.87 (.38)   |
| SMARCB1     | 212167_s_at  | <.001      | -0.28 | 0.82 (.003)  |

\*LC<sub>50</sub> = concentration lethal to 50% of cells; ID = identification number; R/S = resistant versus sensitive ratio.

†*P* value and correlation coefficient value (Rho) were from a Spearman rank correlation test with concentration of prednisolone that is lethal to 50% of cells. All statistical tests were two-sided.

‡R/S ratios and their *P* value (Wilcoxon rank sum test) compared the median gene expression of resistant group with the median gene expression of sensitive group. For prednisolone, resistance = LC<sub>50</sub> ≥ 150 µg/mL; sensitivity = LC<sub>50</sub> ≤ 0.100 µg/mL. For dexamethasone, resistance = LC<sub>50</sub> ≥ 5.8 µg/mL; sensitivity = LC<sub>50</sub> ≤ 0.02 µg/mL.

§Representative *P* value and correlation coefficient value that are based on principal component analysis.

**Supplementary Table 3.** Genes contributing to variation in prednisolone sensitivity as measured by its concentration lethal to 50% of cells: the German Cooperative Study Group for Childhood Acute Lymphoblastic Leukemia COALL-92/97 and the ALL-IX Dutch Childhood Oncology Group discovery cohort\*

| Gene    | Five-gene model        |                | Three-gene model       |                |
|---------|------------------------|----------------|------------------------|----------------|
|         | Estimate <sup>†</sup>  | <i>P</i> value | Estimate <sup>†</sup>  | <i>P</i> value |
| NR3C1   | -0.72 (-1.21 to -0.23) | <.001          | -0.61(-1.02 to -0.2)   | <.001          |
| ARID1A  | -0.70 (-1.07 to -0.33) | .005           | -0.90 (-1.38 to -0.42) | <.001          |
| SMARCB1 | -1.74 (-3.22 to -0.26) | .031           | -2.38 (-4.41 to -0.35) | .001           |
| SMARCA4 | -0.29 (-0.79 to 0.21)  | .19            | —                      | —              |
| SMARCC2 | -0.86 (-2.07 to 0.35)  | .16            | —                      | —              |

\*Multiple linear regression model for prednisolone as measured by its concentration lethal to 50% of cells with five genes (multiple  $r^2 = 21.6\%$ ,  $P < .001$ ), and three genes (multiple  $r^2 = 19.8\%$ ,  $P < .001$ ).

— = gene excluded;  $LC_{50}$  = concentration lethal to 50% of cells. All statistical tests were two-sided.

<sup>†</sup>Estimate and 95% confidence interval from multiple linear regression analysis. Estimate represents the change in  $\log_2(LC_{50})$  with one-fold increase in the expression value.

**Supplementary Table 4.** Prediction accuracy, sensitivity, and specificity from the five-gene or the three-gene models\*

| Drug and cohort                                        | Five-gene model |                | Three-gene model |                |
|--------------------------------------------------------|-----------------|----------------|------------------|----------------|
|                                                        | Value (95% CI)  | <i>P</i> value | Value (95% CI)   | <i>P</i> value |
| <b>Prednisolone in the COALL-DCOG discovery cohort</b> |                 |                |                  |                |
| Prediction accuracy, %                                 | 76 (65 to 85)   | <.001          | 77 (66 to 85)    | <.001          |
| Sensitivity, %                                         | 72 (54 to 87)   |                | 73 (57 to 89)    |                |
| Specificity, %                                         | 87 (75 to 94)   |                | 89 (75 to 96)    |                |
| <b>Prednisolone in the St. Jude validation cohort</b>  |                 |                |                  |                |
| Prediction accuracy, %                                 | 71 (58 to 81)   | .016           | 64 (51 to 76)    | .055           |
| Sensitivity, %                                         | 67 (50 to 83)   |                | 57 (38 to 74)    |                |
| Specificity, %                                         | 76 (58 to 91)   |                | 72 (54 to 88)    |                |
| <b>Dexamethasone in the St. Jude validation cohort</b> |                 |                |                  |                |
| Prediction accuracy, %                                 | 77 (63 to 91)   | .005           | 71 (57 to 86)    | .011           |
| Sensitivity, %                                         | 67 (39 to 89)   |                | 67 (40 to 89)    |                |
| Specificity, %                                         | 91 (72 to 100)  |                | 73 (63 to 96)    |                |

\* CI = confidence interval; COALL-DCOG = German Cooperative Study Group for Childhood Acute Lymphoblastic Leukemia COALL-92/97 and the ALL-IX Dutch Childhood Oncology Group.
